# Supplementary material for: The peri- and intratumoral immune cell infiltrate and PD-L1 status in invasive squamous cell carcinomas of the penis
Source: Clin Transl Oncol. 2021 Aug 27;24(2):331–41. doi: 10.1007/s12094-021-02694-7 (PMC8794908; doi:10.1007/s12094-021-02694-7)
Supplement: Supplementary file 1 — Supplementary file1 (XLSX 11 KB) [file 12094_2021_2694_MOESM1_ESM.xlsx]

## Sheet: Tabelle1
Supplementary Table 1. Clinicopathological characteristics of invasive penile carcinomas (n=30) stained for PD-L1
Clinicopathological characteristics in invasive penile carcinomas stained for PD-L1 (n=30)	Categorization	n	%
age (range 42 - 81 years)	≤65 years	18	60
	>65 years	12	40
Tumor stage	pT1a	10	33.3333
	pT1b	5	16.6667
	pT2	13	43.3333
	pT3	0	0
	pT4	1	3.33333
	pTX	1	3.33333
Tumor infiltration pattern	infiltrative pattern	16	53.3333
	pushing margin	14	46.6667
Tumor type	usual	25	83.3333
	basaloid	5	16.6667
HPV status	negative	15	50
	low risk	2	6.66667
	high risk	13	43.3333
	unkown	0	0
Nodal status	pN0	8	26.6667
	pN>0	3	10
	pNX	19	63.3333
Grading	G1	9	30
	G2	15	50
	G3	6	20
Immune cell infiltrate	low	2	6.66667
	median	10	33.3333
	high	18	60
Immunohistochemistry
p16	negative	18	60
	positive	12	40
